# Supplementary material
Source: Research Square preprint supplement (doi:10.21203/rs.3.rs-9680068/v1)
Supplement: Supplementary file 1 [file 3a6df3f7b1f35190556978a1.xlsx]

## Sheet: Table S1 MANE PCs overview
Gene	RefSeq ID for Select	Ensembl ID for Select	RefSeq ID for MPC	Ensembl ID for MPC	UCSC session URL	ClinGen disease label (24-2-2026)	OMIM condition	Category	Approved name	HGNC ID	Cytoband	Alteration vs MANE select	Inclusion type	Notes
BMP1	NM_006129.5	ENST00000306385.10	NM_001199.4	ENST00000306349.13	https://genome.ucsc.edu/s/ExeterGenetics/MANE_BMP1	#N/A	Osteogenesis imperfecta, type XIII	Skeletal	bone morphogenetic protein 1	HGNC:1067	8p21.3	new final exon(s)	Internal	truncated - missing exons 16-20 from MANE Select
BRAF	NM_004333.6	ENST00000646891.2	NM_001374258.1	ENST00000644969.2	https://genome.ucsc.edu/s/ExeterGenetics/MANE_BRAF	Noonan syndrome and cardiofaciocutaneous syndrome	Cardiofaciocutaneous syndrome	Multi-system	B-Raf proto-oncogene, serine/threonine kinase	HGNC:1097	7q34	multiple	External	additional internal exon and new final exon
CACNA1A	NM_001127222.2	ENST00000360228.11	NM_001127221.2	ENST00000638009.2	https://genome.ucsc.edu/s/ExeterGenetics/MANE_CACNA1A	episodic ataxia type 2	Developmental and epileptic encephalopathy 42, ataxia and migrane	Neurological	calcium voltage-gated channel subunit alpha1 A	HGNC:1388	19p13.13	multiple	External	mutually exclusive exon 37 and final exon has different acceptor. NM_001127222.2(CACNA1A):c.5531G>A (p.Gly1844Asp) strengthens splice scores so could alter balance of splicing isoforms.
CACNA1C	NM_000719.7	ENST00000399655.6	NM_001167623.2	ENST00000399603.6	https://genome.ucsc.edu/s/ExeterGenetics/MANE_CACNA1C	Timothy syndrome and long QT syndrome	Brugada syndrome 3 and LQT8	Cardiac	calcium voltage-gated channel subunit alpha1 C	HGNC:1390	12p13.33	mutually exclusive exon(s)	Internal	2 mutually exclusive exons.
CACNA1D	NM_001128840.3	ENST00000350061.11	NM_000720.4	ENST00000288139.11	https://genome.ucsc.edu/s/ExeterGenetics/MANE_CACNA1D	sinoatrial node dysfunction and deafness and complex neurodevelopmental disorder	Primary aldosteronism, seizures, and neurologic abnormalities	Neurological	calcium voltage-gated channel subunit alpha1 D	HGNC:1391	3p21.1	multiple	Internal	1 mutually exclusive and 1 new exon
CACNB2	NM_201596.3	ENST00000324631.13	NM_201590.3	ENST00000377329.10	https://genome.ucsc.edu/s/ExeterGenetics/MANE_CACNB2	cardiogenetic disease	Brugada syndrome 4	Cardiac	calcium voltage-gated channel auxiliary subunit beta 2	HGNC:1402	10p12	new first exon(s)	Internal	in place of exons 1 and 2 in MANE Select
CDKN2A	NM_000077.5	ENST00000304494.10	NM_058195.4	ENST00000579755.2	https://genome.ucsc.edu/s/ExeterGenetics/MANE_CDKN2A	melanoma-pancreatic cancer syndrome	Melanoma	Cancer	cyclin dependent kinase inhibitor 2A	HGNC:1787	9p21.3	new first exon(s)	Internal	reading frames do not overlap
CLPB	NM_001258392.3	ENST00000538039.6	NM_030813.6	ENST00000294053.9	https://genome.ucsc.edu/s/ExeterGenetics/MANE_CLPB	Leigh syndrome (limited evidence)	3-methylglutaconic aciduria, type VIIA	Neurological	ClpB family mitochondrial disaggregase	HGNC:30664	11q13.4	new internal exon(s)	Internal
COL6A2	NM_001849.4	ENST00000300527.9	NM_058174.3	ENST00000397763.6	https://genome.ucsc.edu/s/ExeterGenetics/MANE_COL6A2	collagen 6-related myopathy	Bethlem myopathy 1B	Muscular/neuropathy	collagen type VI alpha 2 chain	HGNC:2212	21q22.3	new final exon(s)	Internal
CUX1	NM_181552.4	ENST00000292535.12	NM_001913.5	ENST00000622516.6	https://genome.ucsc.edu/s/ExeterGenetics/MANE_CUX1	#N/A	Global developmental delay with or without impaired intellectual development	Neurological	cut like homeobox 1	HGNC:2557	7q22.1	multiple	External	New first exon, exons 15-24 replaced by 9 entirely new exons
DLG4	NM_001321075.3	ENST00000399506.9	NM_001365.5	ENST00000648172.9	https://genome.ucsc.edu/s/ExeterGenetics/MANE_DLG4	complex neurodevelopmental disorder	Intellectual developmental disorder, autosomal dominant 62	Neurological	discs large MAGUK scaffold protein 4	HGNC:2903	17p13.1	new first exon(s)	External	First exon replaced by 3 new 5' exons
DNM1L	NM_012062.5	ENST00000549701.6	NM_001278464.2	ENST00000553257.6	https://genome.ucsc.edu/s/ExeterGenetics/MANE_DNM1L	encephalopathy due to mitochondrial and peroxisomal fission defect	Encephalopathy, lethal, due to defective mitochondrial peroxisomal fission 1	Neurological	dynamin 1 like	HGNC:2973	12p11.21	new internal exon(s)	Internal
DST	NM_001374736.1	ENST00000680361.1	NM_001723.7	ENST00000370765.11	https://genome.ucsc.edu/s/ExeterGenetics/MANE_DST	hereditary sensory and autonomic neuropathy type 6	Neuropathy, hereditary sensory and autonomic, type VI	Muscular/neuropathy	dystonin	HGNC:1090	6p12.1	multiple	Internal	new first exon and two new 3' exons. Severely truncated at both ends compared to MANE Select
DYNC2H1	NM_001377.3	ENST00000375735.7	NM_001080463.2	ENST00000650373.2	https://genome.ucsc.edu/s/ExeterGenetics/MANE_DYNC2H1	asphyxiating thoracic dystrophy 3	Short-rib thoracic dysplasia 3 with or without polydactyly	Skeletal	dynein cytoplasmic 2 heavy chain 1	HGNC:2962	11q22.3	new internal exon(s)	External	just 21bp 7/4307aa so 0.16% change in protein length
DYSF	NM_001130987.2	ENST00000410020.8	NM_003494.4	ENST00000258104.8	https://genome.ucsc.edu/s/ExeterGenetics/MANE_DYSF	autosomal recessive limb-girdle muscular dystrophy	Muscular dystrophy, limb-girdle, autosomal recessive 2	Muscular/neuropathy	dysferlin	HGNC:3097	2p13.2	multiple	Internal	two exons skipped, 1 new internal exon(s) and a new first exon
ERCC6	NM_000124.4	ENST00000355832.10	NM_001277058.2	ENST00000447839.7	https://genome.ucsc.edu/s/ExeterGenetics/MANE_ERCC6	Cockayne spectrum with or without cerebrooculofacioskeletal syndrome	Cockayne syndrome	Multi-system	ERCC excision repair 6, chromatin remodeling factor	HGNC:3438	10q11.23	new final exon(s)	Internal	truncated - missing exons 6-21 from MANE Select
FGFR2	NM_000141.5	ENST00000358487.10	NM_022970.4	ENST00000457416.7	https://genome.ucsc.edu/s/ExeterGenetics/MANE_FGFR2	Apert syndrome, Beare-Stevenson cutis gyrata syndrome, Crouzon syndrome, Pfeiffer syndrome and bent bone dysplasia syndrome 1	Saethre-Chotzen and Apert syndrome	Skeletal	fibroblast growth factor receptor 2	HGNC:3689	10q26.13	mutually exclusive exon(s)	Internal	exon 8
FHL1	NM_001159699.2	ENST00000370683.6	NM_001159702.3	ENST00000394155.8	https://genome.ucsc.edu/s/ExeterGenetics/MANE_FHL1	Emery-Dreifuss muscular dystrophy (limited actionability)	Emery-Dreifuss muscular dystrophy 6, X-linked	Muscular/neuropathy	four and a half LIM domains 1	HGNC:3702	Xq26.3	multiple	Internal	2 new UTR exons, and new start site. new internal exon(s) and leading to premature stop in last exon
GATA2	NM_032638.5	ENST00000341105.7	NM_001145661.2	ENST00000487848.6	https://genome.ucsc.edu/s/ExeterGenetics/MANE_GATA2	GATA2 deficiency with susceptibility to MDS/AML	Immunodeficiency-21	Immune	GATA binding protein 2	HGNC:4171	3q21.3	new first exon(s)	External
GCNT2	NM_145649.5	ENST00000495262.7	NM_001491.3	ENST00000316170.9	https://genome.ucsc.edu/s/ExeterGenetics/MANE_GCNT2	#N/A	Bilateral congenital or childhood onset cataracts	Eye	glucosaminyl (N-acetyl) transferase 2 (I blood group)	HGNC:4204	6p24.3-p24.2	new first exon(s)	Internal
GNAL	NM_182978.4	ENST00000334049.11	NM_001369387.1	ENST00000423027.8	https://genome.ucsc.edu/s/ExeterGenetics/MANE_GNAL	#N/A	Dystonia-25	Neurological	G protein subunit alpha L	HGNC:4388	18p11.21	new first exon(s)	Internal
GNAS	NM_000516.7	ENST00000371085.8	NM_016592.5	ENST00000371075.7	https://genome.ucsc.edu/s/ExeterGenetics/MANE_GNAS	pseudopseudohypoparathyroidism	Pseudohypoparathyroidism	Endocrine	GNAS complex locus	HGNC:4392	20q13.32	new first exon(s)	Internal	2 MPC transcripts each with different alternate exon 1
GNAS	NM_000516.7	ENST00000371085.8	NM_080425.4	ENST00000371100.9	https://genome.ucsc.edu/s/ExeterGenetics/MANE_GNAS	pseudopseudohypoparathyroidism	Pseudohypoparathyroidism	Endocrine	GNAS complex locus	HGNC:4392	20q13.32	new first exon(s)	Internal
GNE	NM_005476.7	ENST00000642385.2	NM_001128227.3	ENST00000396594.8	https://genome.ucsc.edu/s/ExeterGenetics/MANE_GNE	macrothrombocytopenia, isolated	Sialuria	Metabolic	glucosamine (UDP-N-acetyl)-2-epimerase/N-acetylmannosamine kinase	HGNC:23657	9p13.3	new first exon(s)	Internal	and new start codon
GRIA3	NM_007325.5	ENST00000620443.2	NM_000828.5	ENST00000622768.5	https://genome.ucsc.edu/s/ExeterGenetics/MANE_GRIA3	X-linked complex neurodevelopmental disorder	Intellectual developmental disorder, X-linked syndromic, Wu type	Neurological	glutamate ionotropic receptor AMPA type subunit 3	HGNC:4573	Xq25	mutually exclusive exon(s)	Internal	exon 14
HK1	NM_000188.3	ENST00000359426.7	NM_001358263.1	ENST00000643399.2	https://genome.ucsc.edu/s/ExeterGenetics/MANE_HK1	#N/A	Neurodevelopmental disorder with visual defects and brain anomalies, RP, anaemia, neuropathy	Metabolic	hexokinase 1	HGNC:4922	10q22.1	new first exon(s)	Internal
HRAS	NM_005343.4	ENST00000311189.8	NM_176795.5	ENST00000417302.7	https://genome.ucsc.edu/s/ExeterGenetics/MANE_HRAS	Costello syndrome	Costello syndrome	Multi-system	HRas proto-oncogene, GTPase	HGNC:5173	11p15.5	multiple	External	new internal exon(s) and last 2 exons fused
INPP4A	NM_001134225.2	ENST00000409851.8	NM_001351425.2	ENST00000715854.1	https://genome.ucsc.edu/s/ExeterGenetics/MANE_INPP4A	#N/A	Early onset or syndromic epilepsy and ID	Neurological	inositol polyphosphate-4-phosphatase type I A	HGNC:6074	2q11.2	multiple	External	new internal exon(s) and exon 16 is shorter
IQSEC2	NM_001111125.3	ENST00000642864.1	NM_001243197.2	ENST00000639161.2	https://genome.ucsc.edu/s/ExeterGenetics/MANE_IQSEC2	X-linked complex neurodevelopmental disorder	Intellectual developmental disorder, X-linked 1	Neurological	IQ motif and Sec7 domain ArfGEF 2	HGNC:29059	Xp11.22	nested in intron	Internal	new MPC is nested within intron 2 of MANE Select. No exons overlap so could be argued this a different gene.
ITGA6	NM_000210.4	ENST00000684293.1	NM_001394928.1	ENST00000442250.6	https://genome.ucsc.edu/s/ExeterGenetics/MANE_ITGA6	#N/A	Epidermolysis bullosa, junctional 6, with pyloric atresia	Skin	integrin subunit alpha 6	HGNC:6142	2q31.1	multiple	Internal	new exon in intron 5 and skipping exon 25
KRAS	NM_004985.5	ENST00000311936.8	NM_033360.4	ENST00000256078.10	https://genome.ucsc.edu/s/ExeterGenetics/MANE_KRAS	Noonan syndrome and cardiofaciocutaneous syndrome	Noonan syndrome 3	Multi-system	KRAS proto-oncogene, GTPase	HGNC:6407	12p12.1	new internal exon(s)	Internal
LAMA3	NM_198129.4	ENST00000313654.14	NM_000227.6	ENST00000269217.11	https://genome.ucsc.edu/s/ExeterGenetics/MANE_LAMA3	#N/A	Epidermolysis bullosa	Skin	laminin subunit alpha 3	HGNC:6483	18q11.2	new first exon(s)	Internal	truncation of exons 1-38 and nearly all ClinVar variants in shorter MANE PC transcript
LDB3	NM_007078.3	ENST00000361373.9	NM_001368067.1	ENST00000263066.11	https://genome.ucsc.edu/s/ExeterGenetics/MANE_LDB3	dilated cardiomyopathy	Cardiomyopathy, hypertrophic, 24	Cardiac	LIM domain binding 3	HGNC:15710	10q23.2	multiple	Internal	exon 5 lost and 2 exons inserted in place, within same intron. Also new final exon and truncation of 3' end of gene (exons 8-13)
LMNA	NM_170707.4	ENST00000368300.9	NM_005572.4	ENST00000677389.1	https://genome.ucsc.edu/s/ExeterGenetics/MANE_LMNA	lipodystrophy and dilated cardiomyopathy	Hutchinson-Gilford progeria	Multi-system	lamin A/C	HGNC:6636	1q22	new final exon(s)	External	extension of exon 10
MASP1	NM_139125.4	ENST00000296280.11	NM_001879.6	ENST00000337774.10	https://genome.ucsc.edu/s/ExeterGenetics/MANE_MASP1	#N/A	3MC syndrome 1	Multi-system	MBL associated serine protease 1	HGNC:6901	3q27.3	new final exon(s)	Internal	actually 6 new final exons
MECP2	NM_001110792.2	ENST00000453960.7	NM_004992.4	ENST00000303391.11	https://genome.ucsc.edu/s/ExeterGenetics/MANE_MECP2	Rett syndrome	Rett syndrome	Neurological	methyl-CpG binding protein 2	HGNC:6990	Xq28	new internal exon(s)	Internal	contains new start site
MITF	NM_001354604.2	ENST00000352241.9	NM_000248.4	ENST00000394351.9	https://genome.ucsc.edu/s/ExeterGenetics/MANE_MITF	Waardenburg syndrome type 2	Waardenburg syndrome, type 2A	Hearing loss	melanocyte inducing transcription factor	HGNC:7105	3p13	new first exon(s)	Internal	misses two exons from MANE Select at start
MOCS2	NM_004531.5	ENST00000396954.8	NM_176806.4	ENST00000450852.8	https://genome.ucsc.edu/s/ExeterGenetics/MANE_MOCS2	sulfite oxidase deficiency due to molybdenum cofactor deficiency type B	Molybdenum cofactor deficiency B	Metabolic	molybdenum cofactor synthesis 2	HGNC:7193	5q11.2	exon 1 shorter	Internal	new start site and zero coding overlap with MANE Select. NO NEW SEQUENCE INTRODUCED?
MUTYH	NM_001048174.2	ENST00000456914.7	NM_001128425.2	ENST00000710952.2	https://genome.ucsc.edu/s/ExeterGenetics/MANE_MUTYH	familial adenomatous polyposis 2	Adenomas, multiple colorectal	Cancer	mutY DNA glycosylase	HGNC:7527	1p34.1	multiple	Internal	longer exon 3 and new first exon with 5'-UTR that overlaps that of TOE1 on opposing strand. START CODONS OVERLAP!
MYH11	NM_002474.3	ENST00000300036.6	NM_001040113.2	ENST00000452625.7	https://genome.ucsc.edu/s/ExeterGenetics/MANE_MYH11	familial thoracic aortic aneurysm and aortic dissection	Aortic aneurysm, familial thoracic 4	Cardiac	myosin heavy chain 11	HGNC:7569	16p13.11	new internal exon(s)	External	two new internal exons. Last exon now is just UTR which is unusual
NEB	NM_001164508.2	ENST00000397345.8	NM_001164507.2	ENST00000427231.7	https://genome.ucsc.edu/s/ExeterGenetics/MANE_NEB	nemaline myopathy 2 and autosomal dominant nebulin-related myopathy	Nemaline myopathy 2, autosomal recessive	Muscular/neuropathy	nebulin	HGNC:7720	2q23.3	mutually exclusive exon(s)	Internal	exon 143
NFASC	NM_001005388.3	ENST00000339876.11	NM_001160331.2	ENST00000539706.6	https://genome.ucsc.edu/s/ExeterGenetics/MANE_NFASC	#N/A	Neurodevelopmental disorder with central and peripheral motor dysfunction	Neurological	neurofascin	HGNC:29866	1q32.1	multiple	Internal	new exon 1, skips exon 4 and 25-27, and 3 new internal exons
OTOF	NM_194248.3	ENST00000272371.7	NM_194323.3	ENST00000339598.8	https://genome.ucsc.edu/s/ExeterGenetics/MANE_OTOF	autosomal recessive nonsyndromic hearing loss 9	Deafness, autosomal recessive 9	Hearing loss	otoferlin	HGNC:8515	2p23.3	multiple	Internal	new exon 1, truncates exons 1-18, exon 30 shorter, exon 46 skipped.
P4HA2	NM_001017974.2	ENST00000360568.8	NM_001365677.2	ENST00000379104.7	https://genome.ucsc.edu/s/ExeterGenetics/MANE_P4HA2	#N/A	Myopia 25, autosomal dominant	Eye	prolyl 4-hydroxylase subunit alpha 2	HGNC:8547	5q31.1	mutually exclusive exon(s)	Internal	exon 12
PCDH15	NM_001384140.1	ENST00000644397.2	NM_033056.4	ENST00000320301.11	https://genome.ucsc.edu/s/ExeterGenetics/MANE_PCDH15	Usher syndrome type 1	Deafness, autosomal recessive 23	Hearing loss	protocadherin related 15	HGNC:14674	10q21.1	new final exon(s)	Internal	exons 33-38 lost. 2 exons specific to MANE Select not covered well in exomes
PLEC	NM_201384.3	ENST00000345136.8	NM_201378.4	ENST00000356346.7	https://genome.ucsc.edu/s/ExeterGenetics/MANE_PLEC	PLEC-related muscular dystrophy-epidermolysis bullosa simplex spectrum disorder	Epidermolysis bullosa simplex 5A, Ogna type	Skin	plectin	HGNC:9069	8q24.3	new first exon(s)	Internal
PTCH1	NM_000264.5	ENST00000331920.11	NM_001083603.3	ENST00000437951.6	https://genome.ucsc.edu/s/ExeterGenetics/MANE_PTCH1	nevoid basal cell carcinoma syndrome	Basal cell nevus syndrome 1	Skin	patched 1	HGNC:9585	9q22.32	new first exon(s)	Internal
RAB28	NM_001017979.3	ENST00000330852.10	NM_004249.4	ENST00000288723.9	https://genome.ucsc.edu/s/ExeterGenetics/MANE_RAB28	RAB28-related retinopathy	Cone-rod dystrophy 18	Eye	RAB28, member RAS oncogene family	HGNC:9768	4p15.33	new internal exon(s)	Internal	unusual that last exon no longer has stop codon
RBFOX1	NM_018723.4	ENST00000550418.6	NM_145893.3	ENST00000355637.9	https://genome.ucsc.edu/s/ExeterGenetics/MANE_RBFOX1	#N/A	NA	Neurological	RNA binding fox-1 homolog 1	HGNC:18222	16p13.3	multiple	Internal	new first exon, mutually exclusive exon 13, new internal exon in intron 14. Not in OMIM or panelApp so why a MPC gene?
REEP6	NM_138393.4	ENST00000233596.8	NM_001329556.3	ENST00000395479.10	https://genome.ucsc.edu/s/ExeterGenetics/MANE_REEP6	inherited retinal dystrophy	Retinitis pigmentosa 77	Eye	receptor accessory protein 6	HGNC:30078	19p13.3	new internal exon(s)	Internal	exon 5 in MPC is poorly covered in exomes
SCN2A	NM_001040142.2	ENST00000375437.7	NM_001371246.1	ENST00000631182.3	https://genome.ucsc.edu/s/ExeterGenetics/MANE_SCN2A	complex neurodevelopmental disorder	Developmental and epileptic encephalopathy 11	Neurological	sodium voltage-gated channel alpha subunit 2	HGNC:10588	2q24.3	mutually exclusive exon(s)	Internal	exon 6
SCN5A	NM_000335.5	ENST00000423572.7	NM_001099404.2	ENST00000413689.6	https://genome.ucsc.edu/s/ExeterGenetics/MANE_SCN5A	SCN5A-related cardiac rhythm disorder and dilated cardiomyopathy	Brugada syndrome 1	Cardiac	sodium voltage-gated channel alpha subunit 5	HGNC:10593	3p22.2	mutually exclusive exon(s)	Internal	exon 6
SCN8A	NM_001330260.2	ENST00000627620.5	NM_014191.4	ENST00000354534.11	https://genome.ucsc.edu/s/ExeterGenetics/MANE_SCN8A	complex neurodevelopmental disorder	Developmental and epileptic encephalopathy 13	Neurological	sodium voltage-gated channel alpha subunit 8	HGNC:10596	12q13.13	mutually exclusive exon(s)	Internal	exon 6
SEPTIN9	NM_001113491.2	ENST00000427177.6	NM_006640.5	ENST00000329047.13	https://genome.ucsc.edu/s/ExeterGenetics/MANE_SEPTIN9	neuralgic amyotrophy	Amyotrophy, hereditary neuralgic	Muscular/neuropathy	septin 9	HGNC:7323	17q25.3	new first exon(s)	Internal
SLC25A3	NM_002635.4	ENST00000552981.6	NM_005888.4	ENST00000228318.8	https://genome.ucsc.edu/s/ExeterGenetics/MANE_SLC25A3	mitochondrial disease	Mitochondrial phosphate carrier deficiency	Metabolic	solute carrier family 25 member 3	HGNC:10989	12q23.1	mutually exclusive exon(s)	Internal	exon 3
SLC39A14	NM_001128431.4	ENST00000381237.6	NM_015359.6	ENST00000359741.10	https://genome.ucsc.edu/s/ExeterGenetics/MANE_SLC39A14	#N/A	Hypermanganesemia with dystonia 2	Neurological	solute carrier family 39 member 14	HGNC:20858	8p21.3	mutually exclusive exon(s)	Internal	exon 4
SLC4A4	NM_001098484.3	ENST00000264485.11	NM_003759.4	ENST00000340595.4	https://genome.ucsc.edu/s/ExeterGenetics/MANE_SLC4A4	#N/A	Proximal renal tubular acidosis-ocular anomaly syndrome	Multi-system	solute carrier family 4 member 4	HGNC:11030	4q13.3	multiple	Internal	missing exons 1-3 and longer exon 4 which now has start codon
SMARCA4	NM_003072.5	ENST00000344626.10	NM_001387283.1	ENST00000646693.2	https://genome.ucsc.edu/s/ExeterGenetics/MANE_SMARCA4	rhabdoid tumor predisposition syndrome 2 and Coffin-Siris syndrome	Coffin-Siris syndrome 4	Neurological	SWI/SNF related BAF chromatin remodeling complex subunit ATPase 4	HGNC:11100	19p13.2	new internal exon(s)	Internal	no conservation and 34 clinvar variants all conflicting!
STXBP1	NM_001032221.6	ENST00000373299.5	NM_003165.6	ENST00000373302.8	https://genome.ucsc.edu/s/ExeterGenetics/MANE_STXBP1	developmental and epileptic encephalopathy	Developmental and epileptic encephalopathy 4	Neurological	syntaxin binding protein 1	HGNC:11444	9q34.11	new internal exon(s)	External	penultimate exon and contains stop site
SYNE1	NM_182961.4	ENST00000367255.10	NM_001347702.2	ENST00000354674.5	https://genome.ucsc.edu/s/ExeterGenetics/MANE_SYNE1	arthrogryposis multiplex congenita 3, myogenic type and autosomal recessive ataxia, Beauce type	Emery-Dreifuss muscular dystrophy 4, autosomal dominant	Muscular/neuropathy	spectrin repeat containing nuclear envelope protein 1	HGNC:17089	6q25.2	multiple	Internal	new first exon, new internal exon(s), large truncation of exons 1-130, <50% gnomad Exomes have have >20x coverage in MPC exon1
TCF3	NM_003200.5	ENST00000262965.12	NM_001136139.4	ENST00000588136.7	https://genome.ucsc.edu/s/ExeterGenetics/MANE_TCF3	autosomal agammaglobulinemia	Agammaglobulinemia 8A, autosomal dominant	Immune	transcription factor 3	HGNC:11633	19p13.3	multiple	Internal	mutually exclusive 18 and final exon is split into two. Unusual as final exon then is all non-coding which is rare.
TP63	NM_003722.5	ENST00000264731.8	NM_001114980.2	ENST00000354600.10	https://genome.ucsc.edu/s/ExeterGenetics/MANE_TP63	ectrodactyly, ectodermal dysplasia, and cleft lip-palate syndrome 3	Ectrodactyly, ectodermal dysplasia, and cleft lip/palate syndrome 3	Skeletal	tumor protein p63	HGNC:15979	3q28	new first exon(s)	Internal	removes 3 first exons of MANE Select
USH1C	NM_153676.4	ENST00000005226.12	NM_005709.4	ENST00000318024.9	https://genome.ucsc.edu/s/ExeterGenetics/MANE_USH1C	nonsyndromic genetic hearing loss	Usher syndrome, type 1C	Hearing loss	USH1 protein network component harmonin	HGNC:12597	11p15.1	multiple	Internal	skips exon 26, also skips exons 15-20 and new exon 15 included
VPS13B	NM_152564.5	ENST00000357162.7	NM_017890.5	ENST00000358544.7	https://genome.ucsc.edu/s/ExeterGenetics/MANE_VPS13B	Cohen syndrome	Cohen syndrome	Multi-system	vacuolar protein sorting 13 homolog B	HGNC:2183	8q22.2	mutually exclusive exon(s)	Internal	All ClinVar results in the PC version of exon 18 and none in MANE Select verion
WDR35	NM_020779.4	ENST00000281405.9	NM_001006657.2	ENST00000345530.8	https://genome.ucsc.edu/s/ExeterGenetics/MANE_WDR35	short-rib thoracic dysplasia 7 with or without polydactyly and cranioectodermal dysplasia 2	Cranioectodermal dysplasia 2	Skeletal	WD repeat domain 35	HGNC:29250	2p24.1	new internal exon(s)	Internal
WNK1	NM_018979.4	ENST00000315939.11	NM_213655.5	ENST00000340908.9	https://genome.ucsc.edu/s/ExeterGenetics/MANE_WNK1	neuropathy, hereditary sensory and autonomic, type 2A	Neuropathy, hereditary sensory and autonomic, type II	Muscular/neuropathy	WNK lysine deficient protein kinase 1	HGNC:14540	12p13.33	multiple	Internal	skipping exons 11-12 and inclusion of 2 new exons into intron 8

## Sheet: Table S2 MANE PCs bp
Gene and transcript IDs (MS | MPC)	geneSymbol	Select only (bp)	MPC only (bp)	MANE CDS to MPC UTR (bp)	MANE UTR to MPC CDS (bp)
BMP1 | ENST00000306385 | ENST00000306349	BMP1	849	85	0	0
BRAF | ENST00000646891 | ENST00000644969	BRAF	20	141	0	0
CACNA1A | ENST00000360228 | ENST00000638009	CACNA1A	102	99	732	0
CACNA1C | ENST00000399655 | ENST00000399603	CACNA1C	186	186	0	0
CACNA1D | ENST00000350061 | ENST00000288139	CACNA1D	103	162	0	0
CACNB2 | ENST00000324631 | ENST00000377329	CACNB2	211	50	0	0
CDKN2A | ENST00000304494 | ENST00000579755	CDKN2A	150	192	113	0
CLPB | ENST00000538039 | ENST00000294053	CLPB	0	89	0	0
COL6A2 | ENST00000300527 | ENST00000397763	COL6A2	598	295	0	0
CUX1 | ENST00000292535 | ENST00000622516	CUX1	3315	835	0	0
DLG4 | ENST00000399506 | ENST00000648172	DLG4	29	156	0	0
DNM1L | ENST00000549701 | ENST00000553257	DNM1L	0	38	0	0
DST | ENST00000680361 | ENST00000370765	DST	20223	4796	0	0
DYNC2H1 | ENST00000375735 | ENST00000650373	DYNC2H1	0	20	0	0
DYSF | ENST00000410020 | ENST00000258104	DYSF	244	128	0	0
ERCC6 | ENST00000355832 | ENST00000447839	ERCC6	3069	1788	0	0
FGFR2 | ENST00000358487 | ENST00000457416	FGFR2	144	147	0	0
FHL1 | ENST00000370683 | ENST00000394155	FHL1	23	199	95	0
GATA2 | ENST00000341105 | ENST00000487848	GATA2	0	0	0	0
GCNT2 | ENST00000495262 | ENST00000316170	GCNT2	924	918	0	0
GNAL | ENST00000334049 | ENST00000423027	GNAL	375	144	0	0
GNAS | 1 | ENST00000371085 | ENST00000371075	GNAS_1	138	737	0	0
GNAS | 2 | ENST00000371085 | ENST00000371100	GNAS_2	138	2067	0	0
GNE | ENST00000642385 | ENST00000396594	GNE	0	51	0	41
GRIA3 | ENST00000620443 | ENST00000622768	GRIA3	114	114	0	0
HK1 | ENST00000359426 | ENST00000643399	HK1	62	73	0	0
HRAS | ENST00000311189 | ENST00000417302	HRAS	0	62	119	0
INPP4A | ENST00000409851 | ENST00000715854	INPP4A	117	17	0	0
IQSEC2 | ENST00000642864 | ENST00000639161	IQSEC2	4452	219	0	0
ITGA6 | ENST00000684293 | ENST00000442250	ITGA6	107	116	0	161
KRAS | ENST00000311936 | ENST00000256078	KRAS	0	119	116	0
LAMA3 | ENST00000313654 | ENST00000269217	LAMA3	4960	170	0	0
LDB3 | ENST00000361373 | ENST00000263066	LDB3	1648	321	0	0
LMNA | ENST00000368300 | ENST00000677389	LMNA	295	21	0	0
MASP1 | ENST00000296280 | ENST00000337774	MASP1	883	791	0	0
MECP2 | ENST00000453960 | ENST00000303391	MECP2	0	25	61	0
MITF | ENST00000352241 | ENST00000394351	MITF	352	32	0	0
MOCS2 | ENST00000396954 | ENST00000450852	MOCS2	1	1	482	184
MUTYH | ENST00000456914 | ENST00000710952	MUTYH	0	78	0	5
MYH11 | ENST00000300036 | ENST00000452625	MYH11	0	50	132	0
NEB | ENST00000397345 | ENST00000427231	NEB	104	104	0	0
NFASC | ENST00000339876 | ENST00000539706	NFASC	521	369	0	0
OTOF | ENST00000272371 | ENST00000339598	OTOF	2437	0	26	180
P4HA2 | ENST00000360568 | ENST00000379104	P4HA2	59	65	0	0
PCDH15 | ENST00000644397 | ENST00000320301	PCDH15	850	1500	0	0
PLEC | ENST00000345136 | ENST00000356346	PLEC	111	69	0	0
PTCH1 | ENST00000331920 | ENST00000437951	PTCH1	200	197	0	0
RAB28 | ENST00000330852 | ENST00000288723	RAB28	0	89	92	0
RBFOX1 | ENST00000550418 | ENST00000355637	RBFOX1	65	180	121	0
REEP6 | ENST00000233596 | ENST00000395479	REEP6	0	80	0	0
SCN2A | ENST00000375437 | ENST00000631182	SCN2A	91	91	0	0
SCN5A | ENST00000423572 | ENST00000413689	SCN5A	91	94	0	0
SCN8A | ENST00000627620 | ENST00000354534	SCN8A	91	91	0	0
SEPTIN9 | ENST00000427177 | ENST00000329047	SEPTIN9	74	21	0	0
SLC25A3 | ENST00000552981 | ENST00000228318	SLC25A3	121	124	0	0
SLC39A14 | ENST00000381237 | ENST00000359741	SLC39A14	169	169	0	0
SLC4A4 | ENST00000264485 | ENST00000340595	SLC4A4	251	121	0	0
SMARCA4 | ENST00000344626 | ENST00000646693	SMARCA4	0	95	0	0
STXBP1 | ENST00000373299 | ENST00000373302	STXBP1	0	109	82	0
SYNE1 | ENST00000367255 | ENST00000354674	SYNE1	23499	159	0	0
TCF3 | ENST00000262965 | ENST00000588136	TCF3	235	226	0	0
TP63 | ENST00000264731 | ENST00000354600	TP63	321	41	0	0
USH1C | ENST00000005226 | ENST00000318024	USH1C	1077	73	31	0
VPS13B | ENST00000357162 | ENST00000358544	VPS13B	66	141	0	0
WDR35 | ENST00000281405 | ENST00000345530	WDR35	0	32	0	0
WNK1 | ENST00000315939 | ENST00000340908	WNK1	736	1492	0	0

## Sheet: Table S3 diagnostic impact
Gene	ClinVar P/LP	ClinVar P/LP in MPC region	% specific to MPC	NGRL diagnostic alleles	NGRL diagnostic alleles in MPC regions	% specific to MPC	Notes
LDB3	51	2	0.0392157	3	3	1	Two individuals with distal myopathies/limb-girdle muscular dystrophy harbouring a heterozygous NM_001368067.1:c.439G>A (p.Ala147Thr) (VCV000004727.66) and another heterozygote with distal myopathies with NM_001368067.1:c.494C>T (p.Ala165Val) (VCV000004728.64).
DYNC2H1	593	2	0.00337268	6	2	0.333333	Two individuals with variants in the short 7-codon exon, NM_001080463.2:c.9836C>G (VCV000978199.2), and NM_001080463.2:c.9836C>A (both p.Ser3279Ter) and recruited with rod-cone dystrophy.
DST	189	55	0.291005	1	1	1	Homozygous indel NM_001723.7:c.5469_5470del, p.(N1823Kfs*9) in female with epidermolysis bullosa.
HK1	41	3	0.0731707	5	1	0.2	Homozygous stop-gain NM_001358263.1:c.19C>T (p.Arg7Ter) (VCV001172759.5) in male recruited with Charcot-Marie-Tooth disease.
TP63	134	3	0.0223881	5	1	0.2	Female with ectodermal dysplasia is heterozygous for start-codon loss NM_001114980.2:c.2T>G (p.Met1Arg)(VCV004075221.1).
CACNA1A	592	8	0.0135135	53	1	0.0188679	Individual with hereditary ataxia is heterozygous for NM_001127221.2:c.5569C>T (p.Arg1857Ter) (VCV000857862.12).
BRAF	148	0	0	11	0	0
FGFR2	135	0	0	2	0	0
GATA2	241	0	0	2	0	0
INPP4A	8	0	0	0	0	0
ITGA6	54	0	0	0	0	0
OTOF	362	0	0	6	0	0
WNK1	75	49	0.653333	0	0	0
NFASC	13	5	0.384615	0	0	0
SEPTIN9	3	1	0.333333	0	0	0
GCNT2	14	4	0.285714	1	0	0
CACNB2	4	1	0.25	0	0	0
P4HA2	4	1	0.25	0	0	0
GNAL	23	5	0.217391	1	0	0
RBFOX1	5	1	0.2	0	0	0
SLC25A3	10	2	0.2	0	0	0
PCDH15	479	72	0.150313	3	0	0
SLC39A14	14	2	0.142857	0	0	0
RAB28	22	3	0.136364	1	0	0
CACNA1D	23	3	0.130435	2	0	0
TCF3	30	3	0.1	0	0	0
BMP1	46	4	0.0869565	0	0	0
CDKN2A	212	18	0.0849057	0	0	0
MASP1	24	2	0.0833333	0	0	0
CUX1	54	4	0.0740741	1	0	0
REEP6	28	2	0.0714286	0	0	0
GRIA3	47	3	0.0638298	2	0	0
SLC4A4	16	1	0.0625	0	0	0
GNAS	247	14	0.0566802	10	0	0
CLPB	54	3	0.0555556	0	0	0
USH1C	188	10	0.0531915	3	0	0
LAMA3	264	13	0.0492424	2	0	0
DNM1L	70	3	0.0428571	0	0	0
CACNA1C	123	5	0.0406504	2	0	0
MYH11	91	3	0.032967	1	0	0
MUTYH	519	16	0.0308285	0	0	0
SCN8A	414	12	0.0289855	25	0	0
KRAS	104	3	0.0288462	1	0	0
ERCC6	349	9	0.025788	6	0	0
FHL1	106	2	0.0188679	1	0	0
MOCS2	54	1	0.0185185	0	0	0
HRAS	56	1	0.0178571	0	0	0
MITF	134	2	0.0149254	5	0	0
WDR35	73	1	0.0136986	0	0	0
PLEC	153	2	0.0130719	1	0	0
GNE	232	3	0.012931	0	0	0
VPS13B	946	10	0.0105708	18	0	0
IQSEC2	224	2	0.00892857	14	0	0
DYSF	921	8	0.00868621	2	0	0
DLG4	117	1	0.00854701	11	0	0
PTCH1	743	6	0.00807537	6	0	0
LMNA	669	4	0.00597907	8	0	0
SYNE1	377	2	0.00530504	16	0	0
MECP2	783	4	0.00510856	51	0	0
STXBP1	411	2	0.00486618	19	0	0
SCN5A	657	3	0.00456621	3	0	0
COL6A2	288	1	0.00347222	7	0	0
SMARCA4	330	1	0.0030303	11	0	0
SCN2A	717	2	0.0027894	27	0	0
NEB	1790	4	0.00223464	8	0	0
Total	15898	412	0.0259152	363	9	0.0247934
