# Supplementary material
Source: Research Square preprint supplement (doi:10.21203/rs.3.rs-9680068/v1)
Supplement: Supplementary file 2 [file 63d924d4bb97c5b1e5a85709.docx]

**Supplementary Information**

Additional file 1: Contains two supplementary notes (**Notes S1-2**), three supplementary tables (**Tables S4-6**) and 11 supplementary figures (**Figures S1-11**). Additional file 2: Contains the first three supplementary tables (**Tables S1-3**).
